# Supplementary material for: Comparative transcriptome analyses of flower development in four species of Achimenes (Gesneriaceae)
Source: PubMed Central journal article supplement (PMC5359931; doi:10.1186/s12864-017-3623-8), 2017-03-20
Supplement: 12864_2017_3623_MOESM3_ESM.pdf [file 12864_2017_3623_MOESM3_ESM.pdf]

**A.**

### Level 2 Gene Ontology

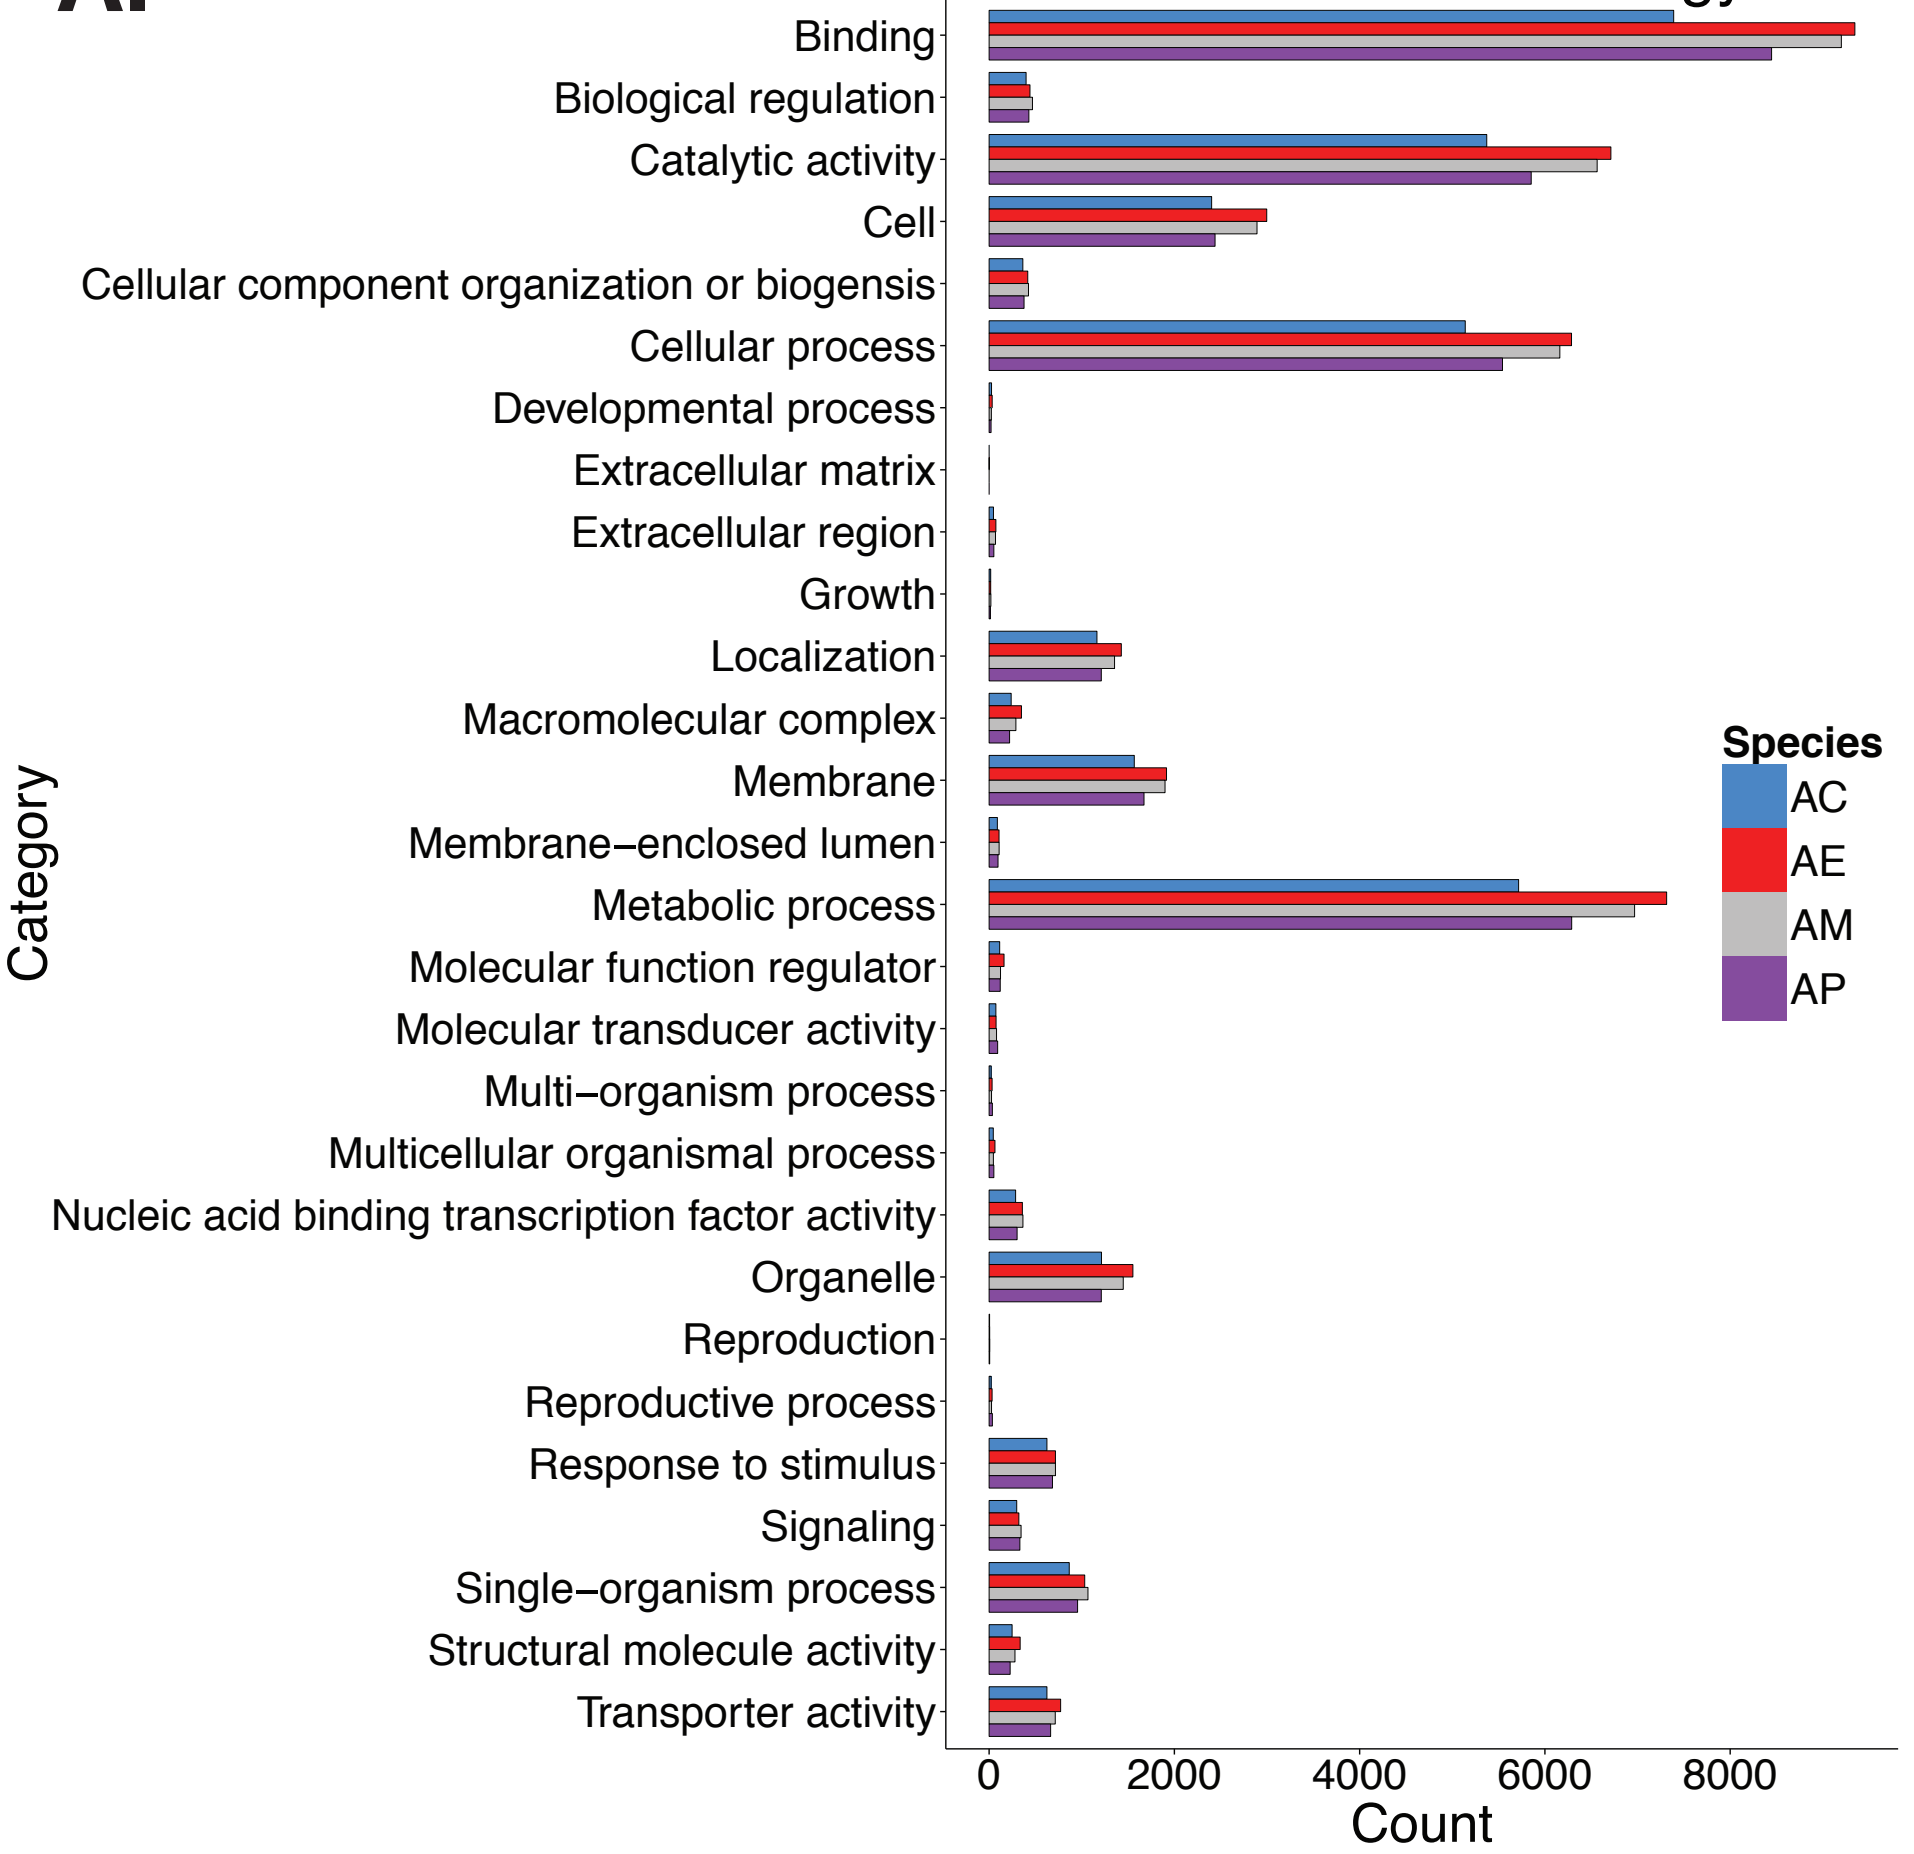

**B.**

### Biological Process

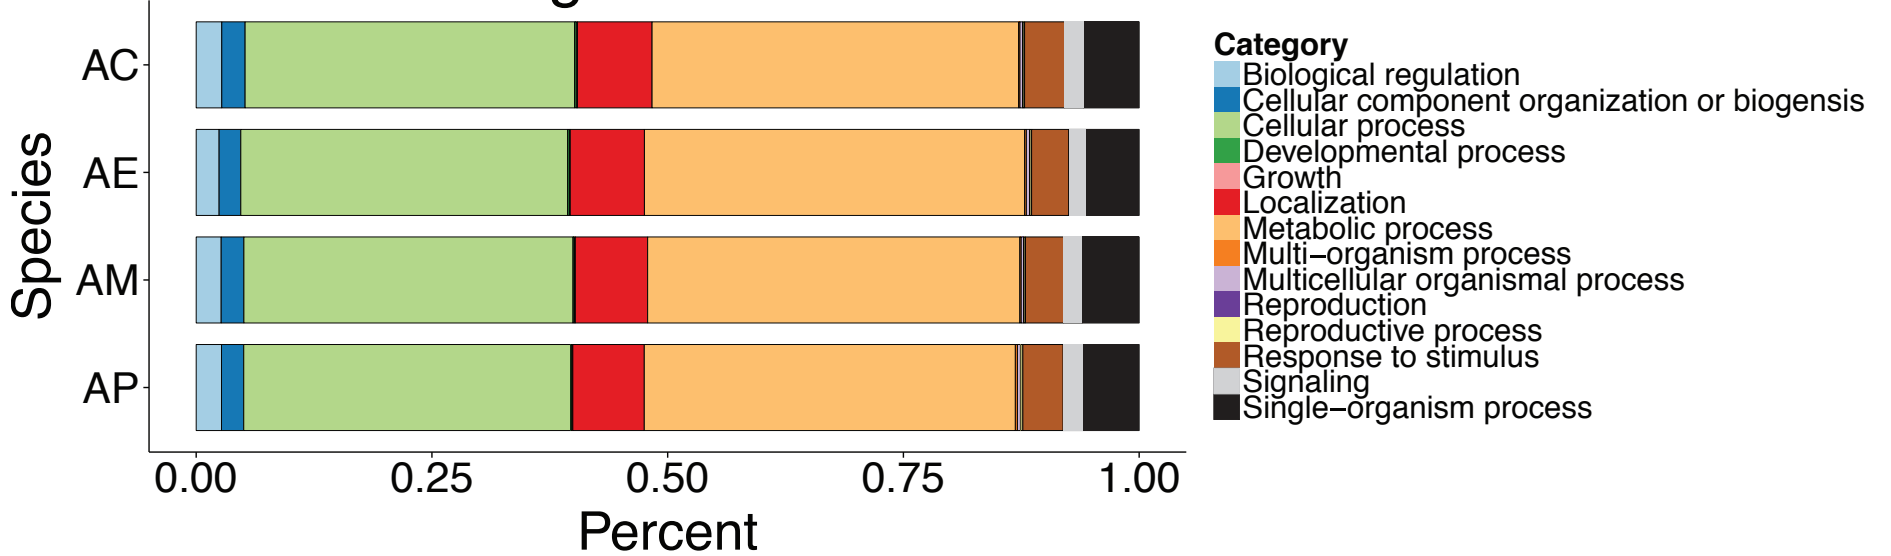

### Cellular Component

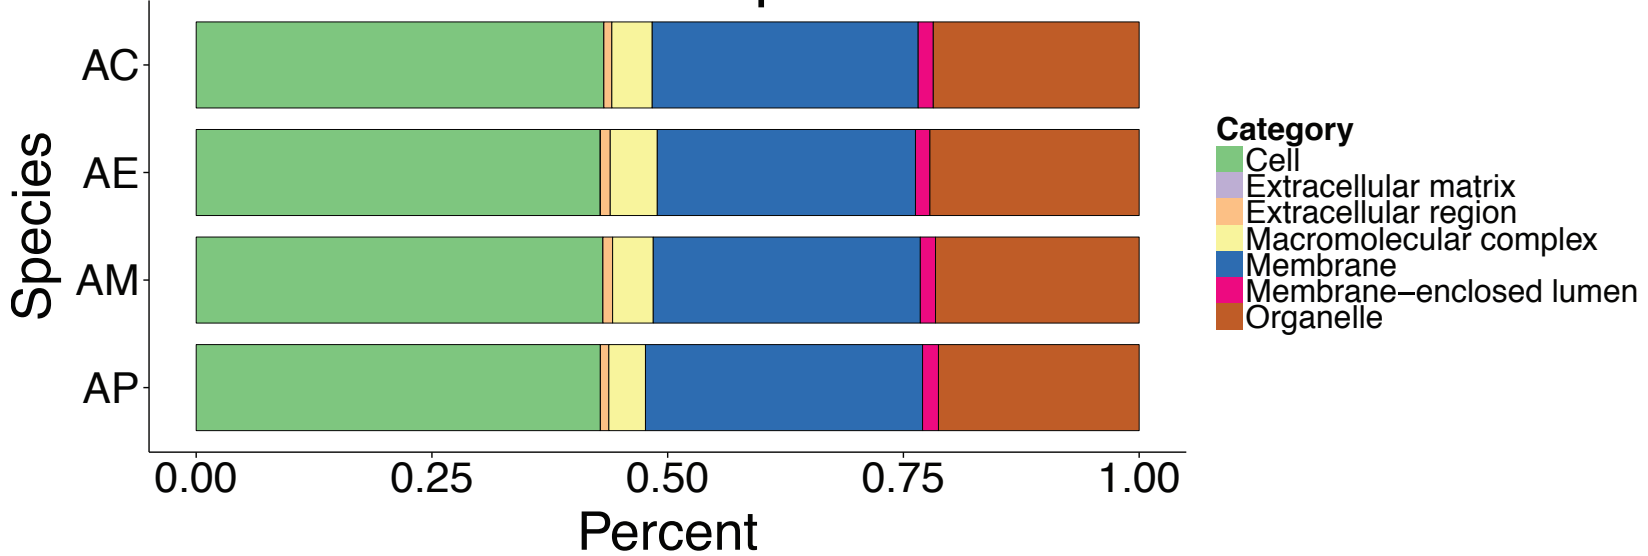

### Molecular Function

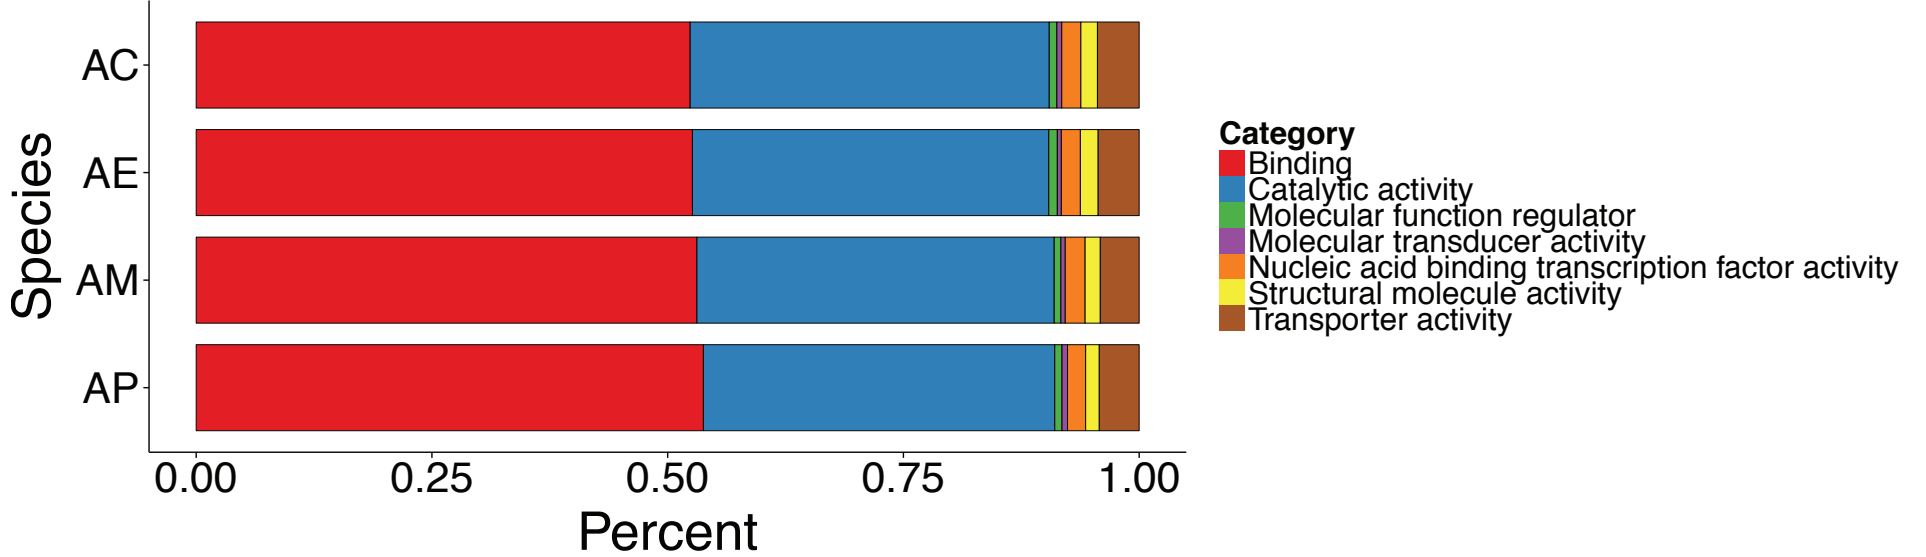

Abbreviations: AC, *A. cettoana*; AE, *A. erecta*; AM, *A. misera*; AP, *A. patens*.
