# Supplementary material for: Comparative transcriptome analyses of flower development in four species of Achimenes (Gesneriaceae)
Source: PubMed Central journal article supplement (PMC5359931; doi:10.1186/s12864-017-3623-8), 2017-03-20

Additional file 5: Figure S2. Neighbor-joining tree of anthocyanidin synthase (**ANS**) homologs. Putative *Achimenes* orthologs are highlighted in red. Bootstrap support >50 are indicated above branches.

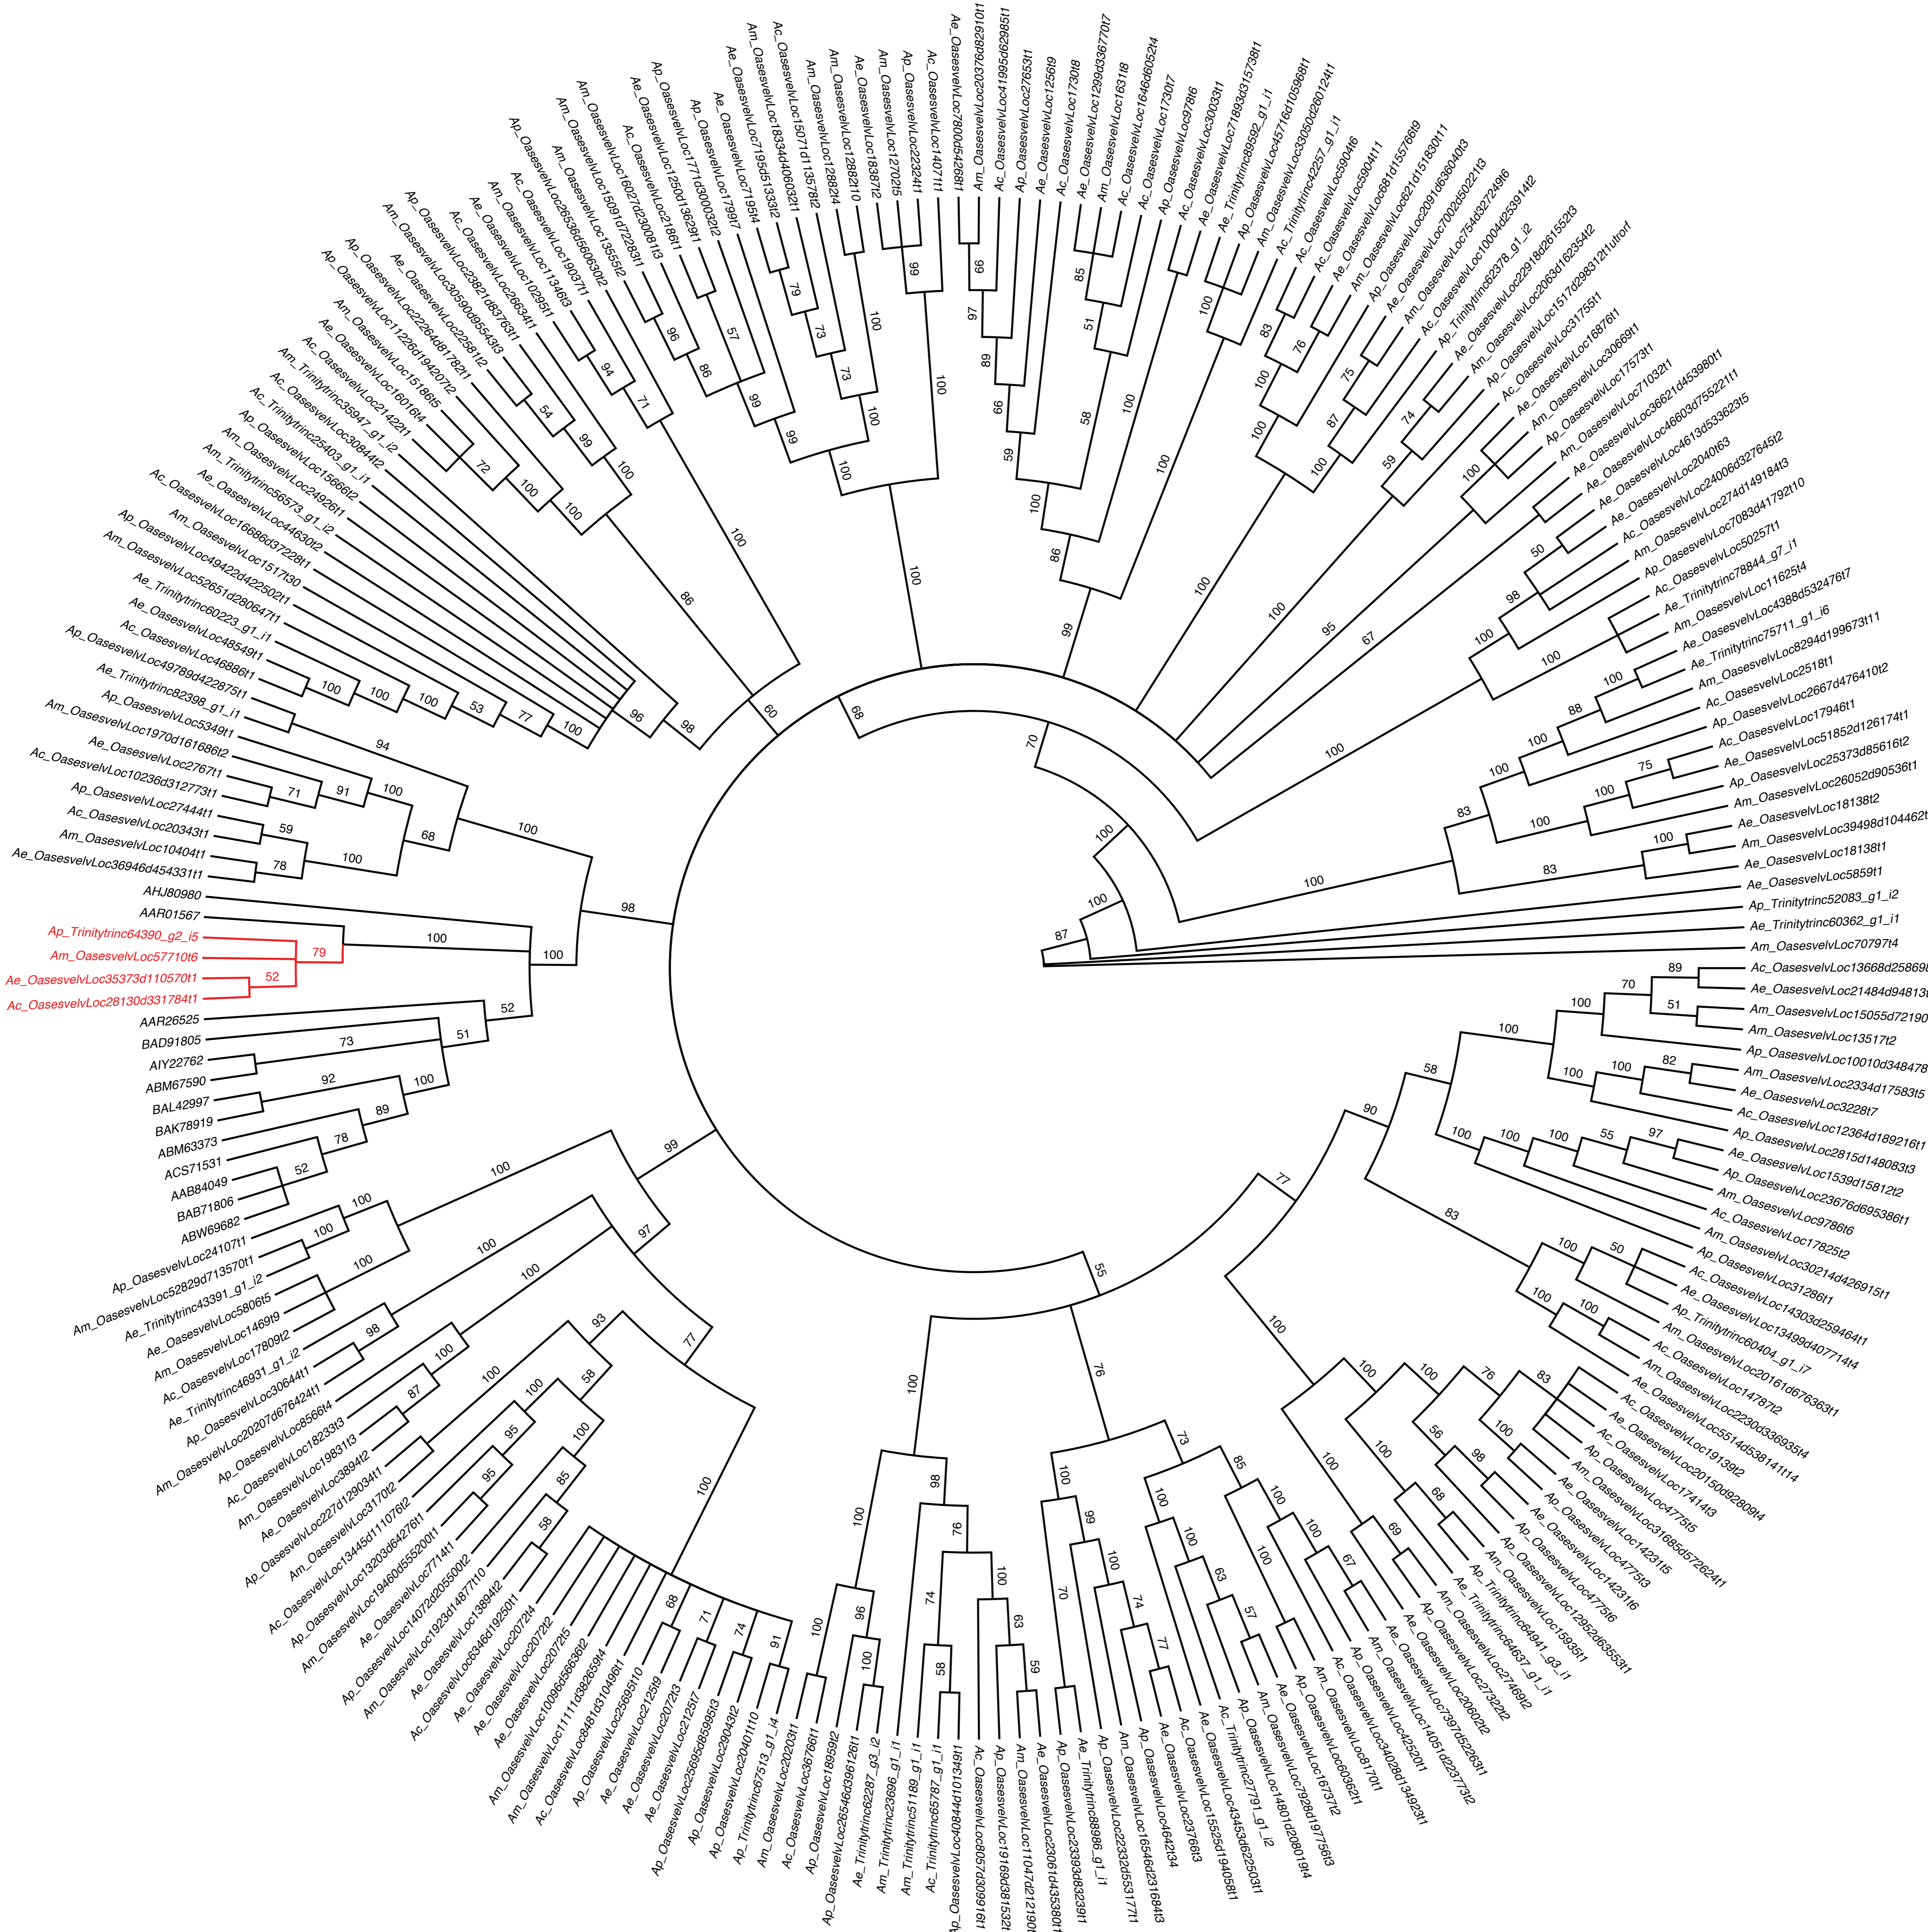

Supplement: 12864_2017_3623_MOESM5_ESM.pdf [file 12864_2017_3623_MOESM5_ESM.pdf]
