# Supplementary material for: Comparative transcriptome analyses of flower development in four species of Achimenes (Gesneriaceae)
Source: PubMed Central journal article supplement (PMC5359931; doi:10.1186/s12864-017-3623-8), 2017-03-20

Additional file 6: Figure S3. Neighbor-joining tree of dihydroflavonol 4-reductase (*DFR*) homologs. Putative *Achimenes* DFR orthologs are highlighted in red. Bootstrap support >50 are indicated above branches.

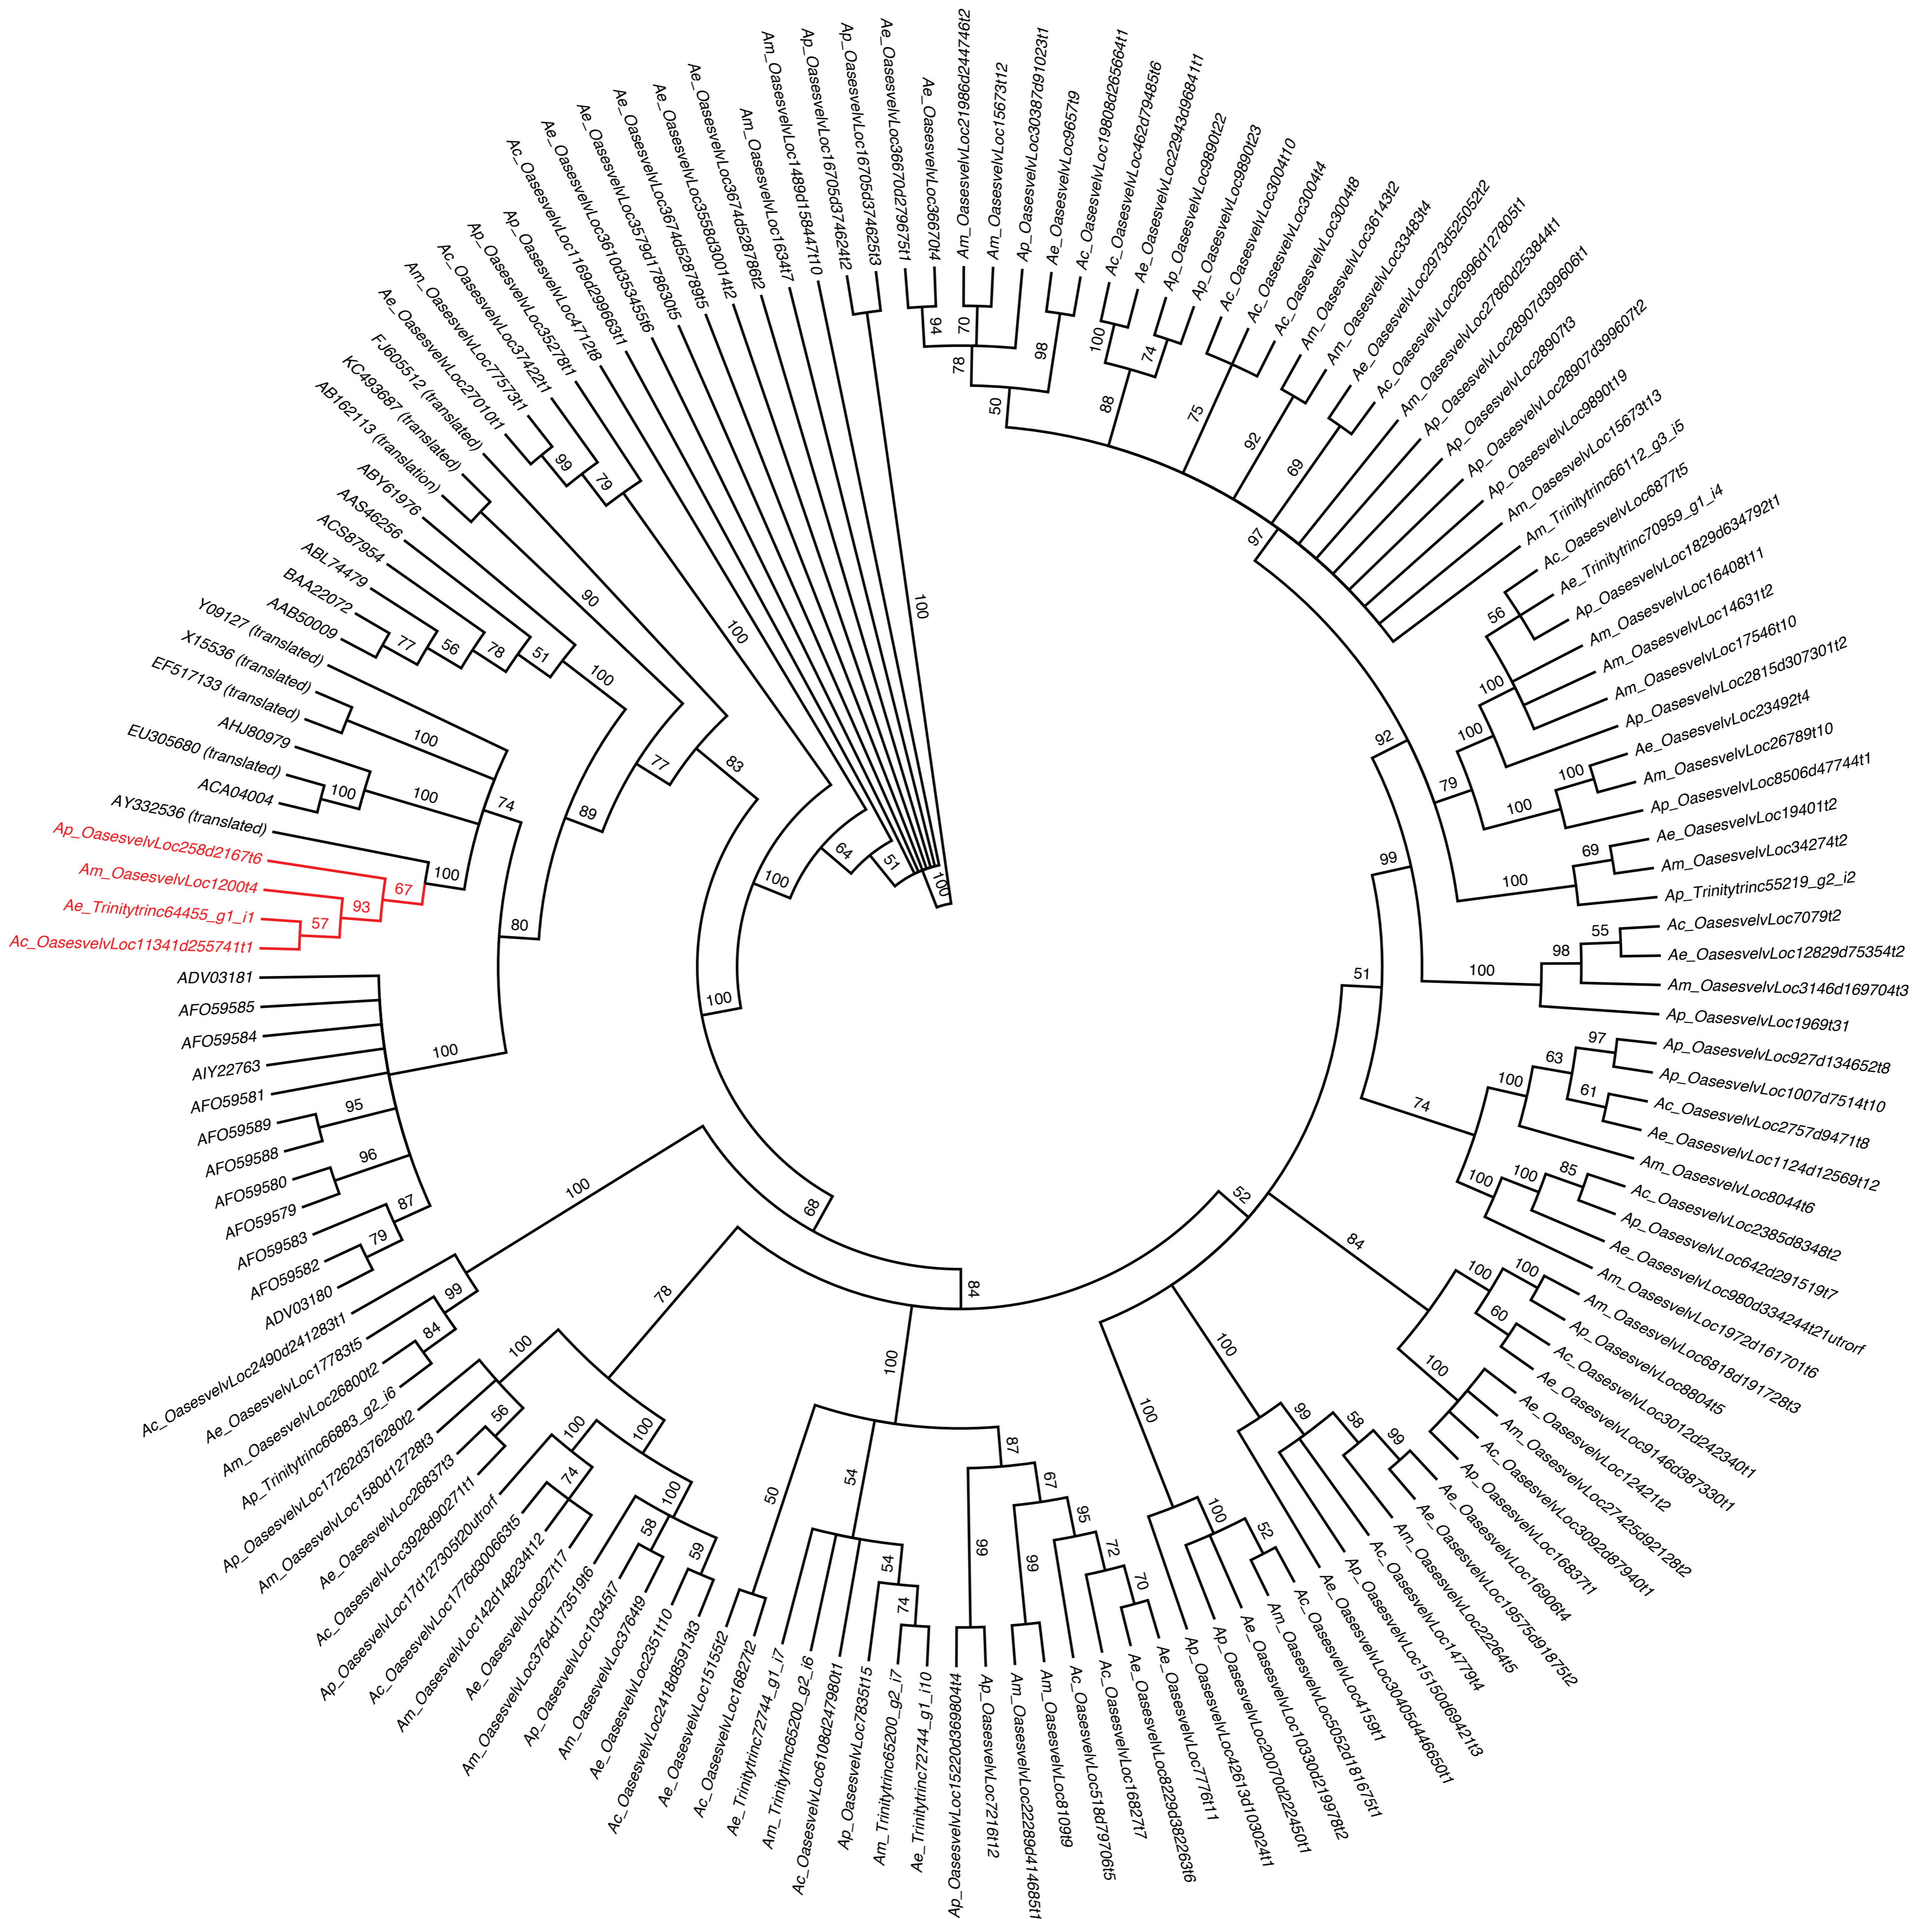

Supplement: 12864_2017_3623_MOESM6_ESM.pdf [file 12864_2017_3623_MOESM6_ESM.pdf]
