# Supplementary material for: Comparative transcriptome analyses of flower development in four species of Achimenes (Gesneriaceae)
Source: PubMed Central journal article supplement (PMC5359931; doi:10.1186/s12864-017-3623-8), 2017-03-20

Additional file 8: Figure S5. Aligned protein sequences for *Achimenes F3'H*, *F3'5'H*, and *DFR*. Amino acid substitutions between the sequences of *A. cettoana*, *A. erecta*, *A. misera*, and *A. patens* are highlighted in blue, red, black, and pink, respectively. A, *F3'H*; B, *F3'5'H*; C, *DFR*.

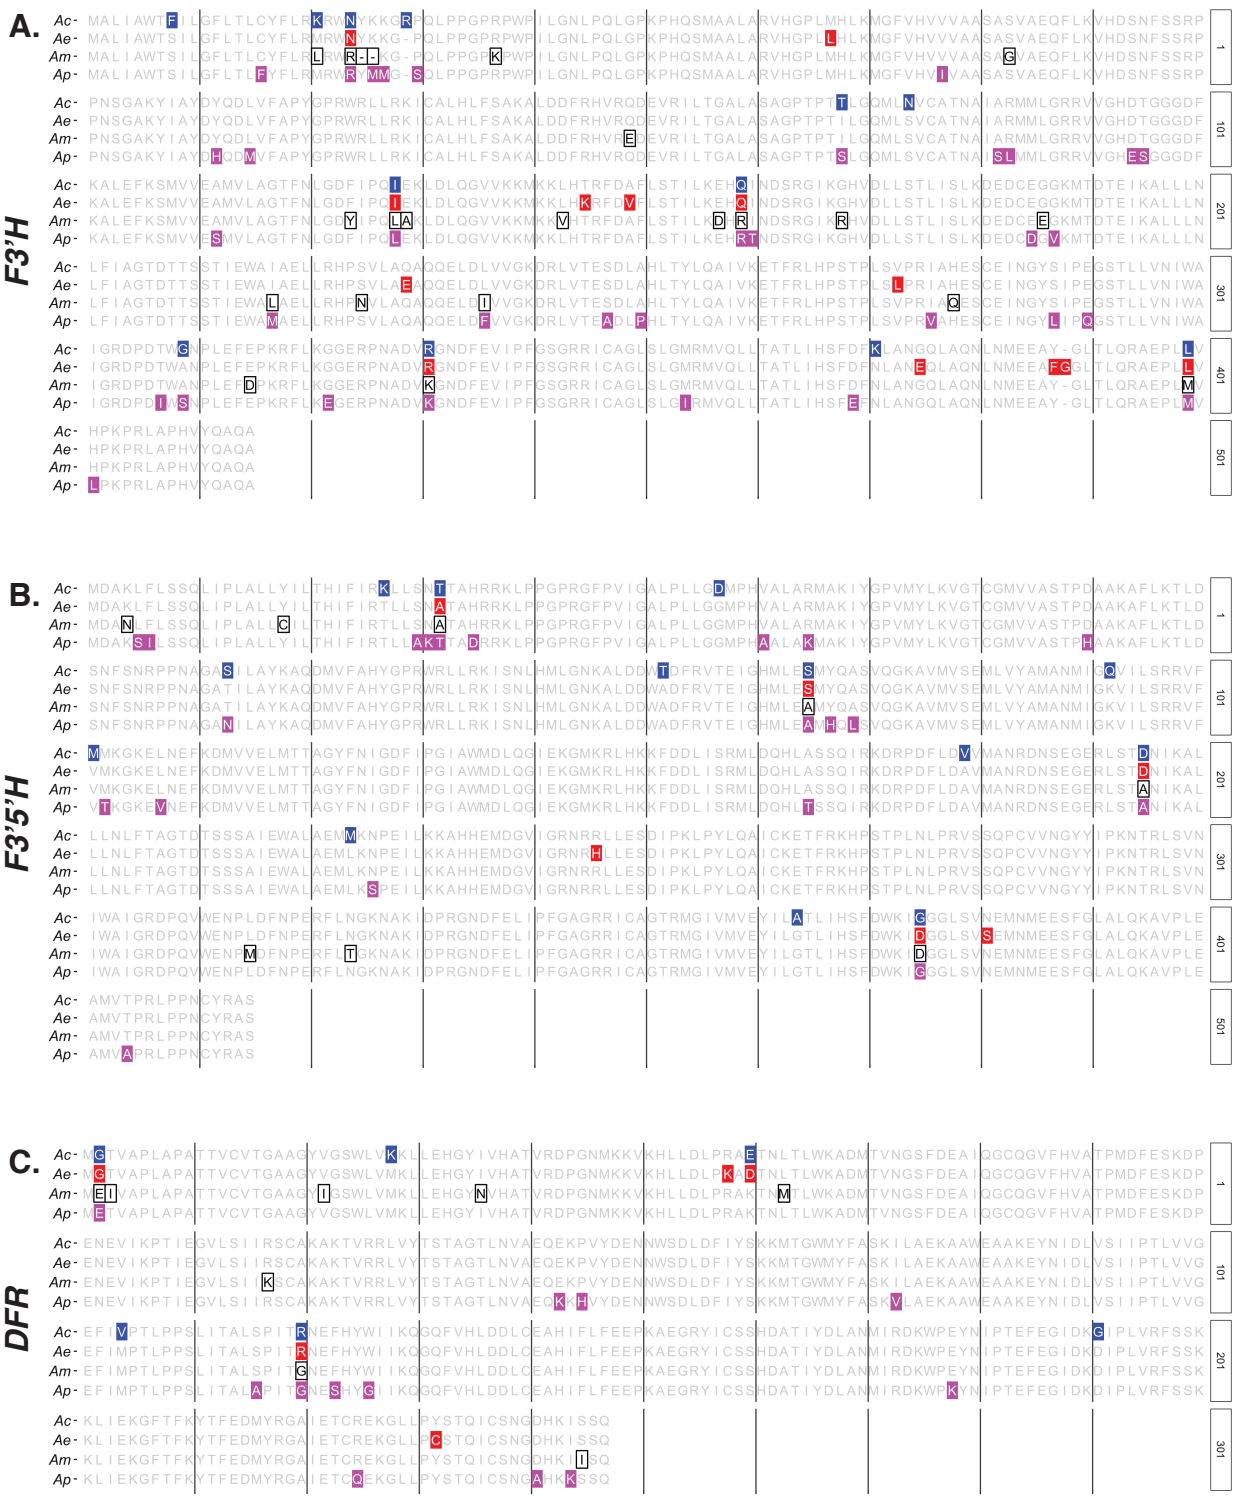

Supplement: 12864_2017_3623_MOESM8_ESM.pdf [file 12864_2017_3623_MOESM8_ESM.pdf]
