# Supplementary material for: Comparative transcriptome analyses of flower development in four species of Achimenes (Gesneriaceae)
Source: PubMed Central journal article supplement (PMC5359931; doi:10.1186/s12864-017-3623-8), 2017-03-20

Additional file 10: Figure S6. Expression of genes involved in flower development in *Achimenes*.

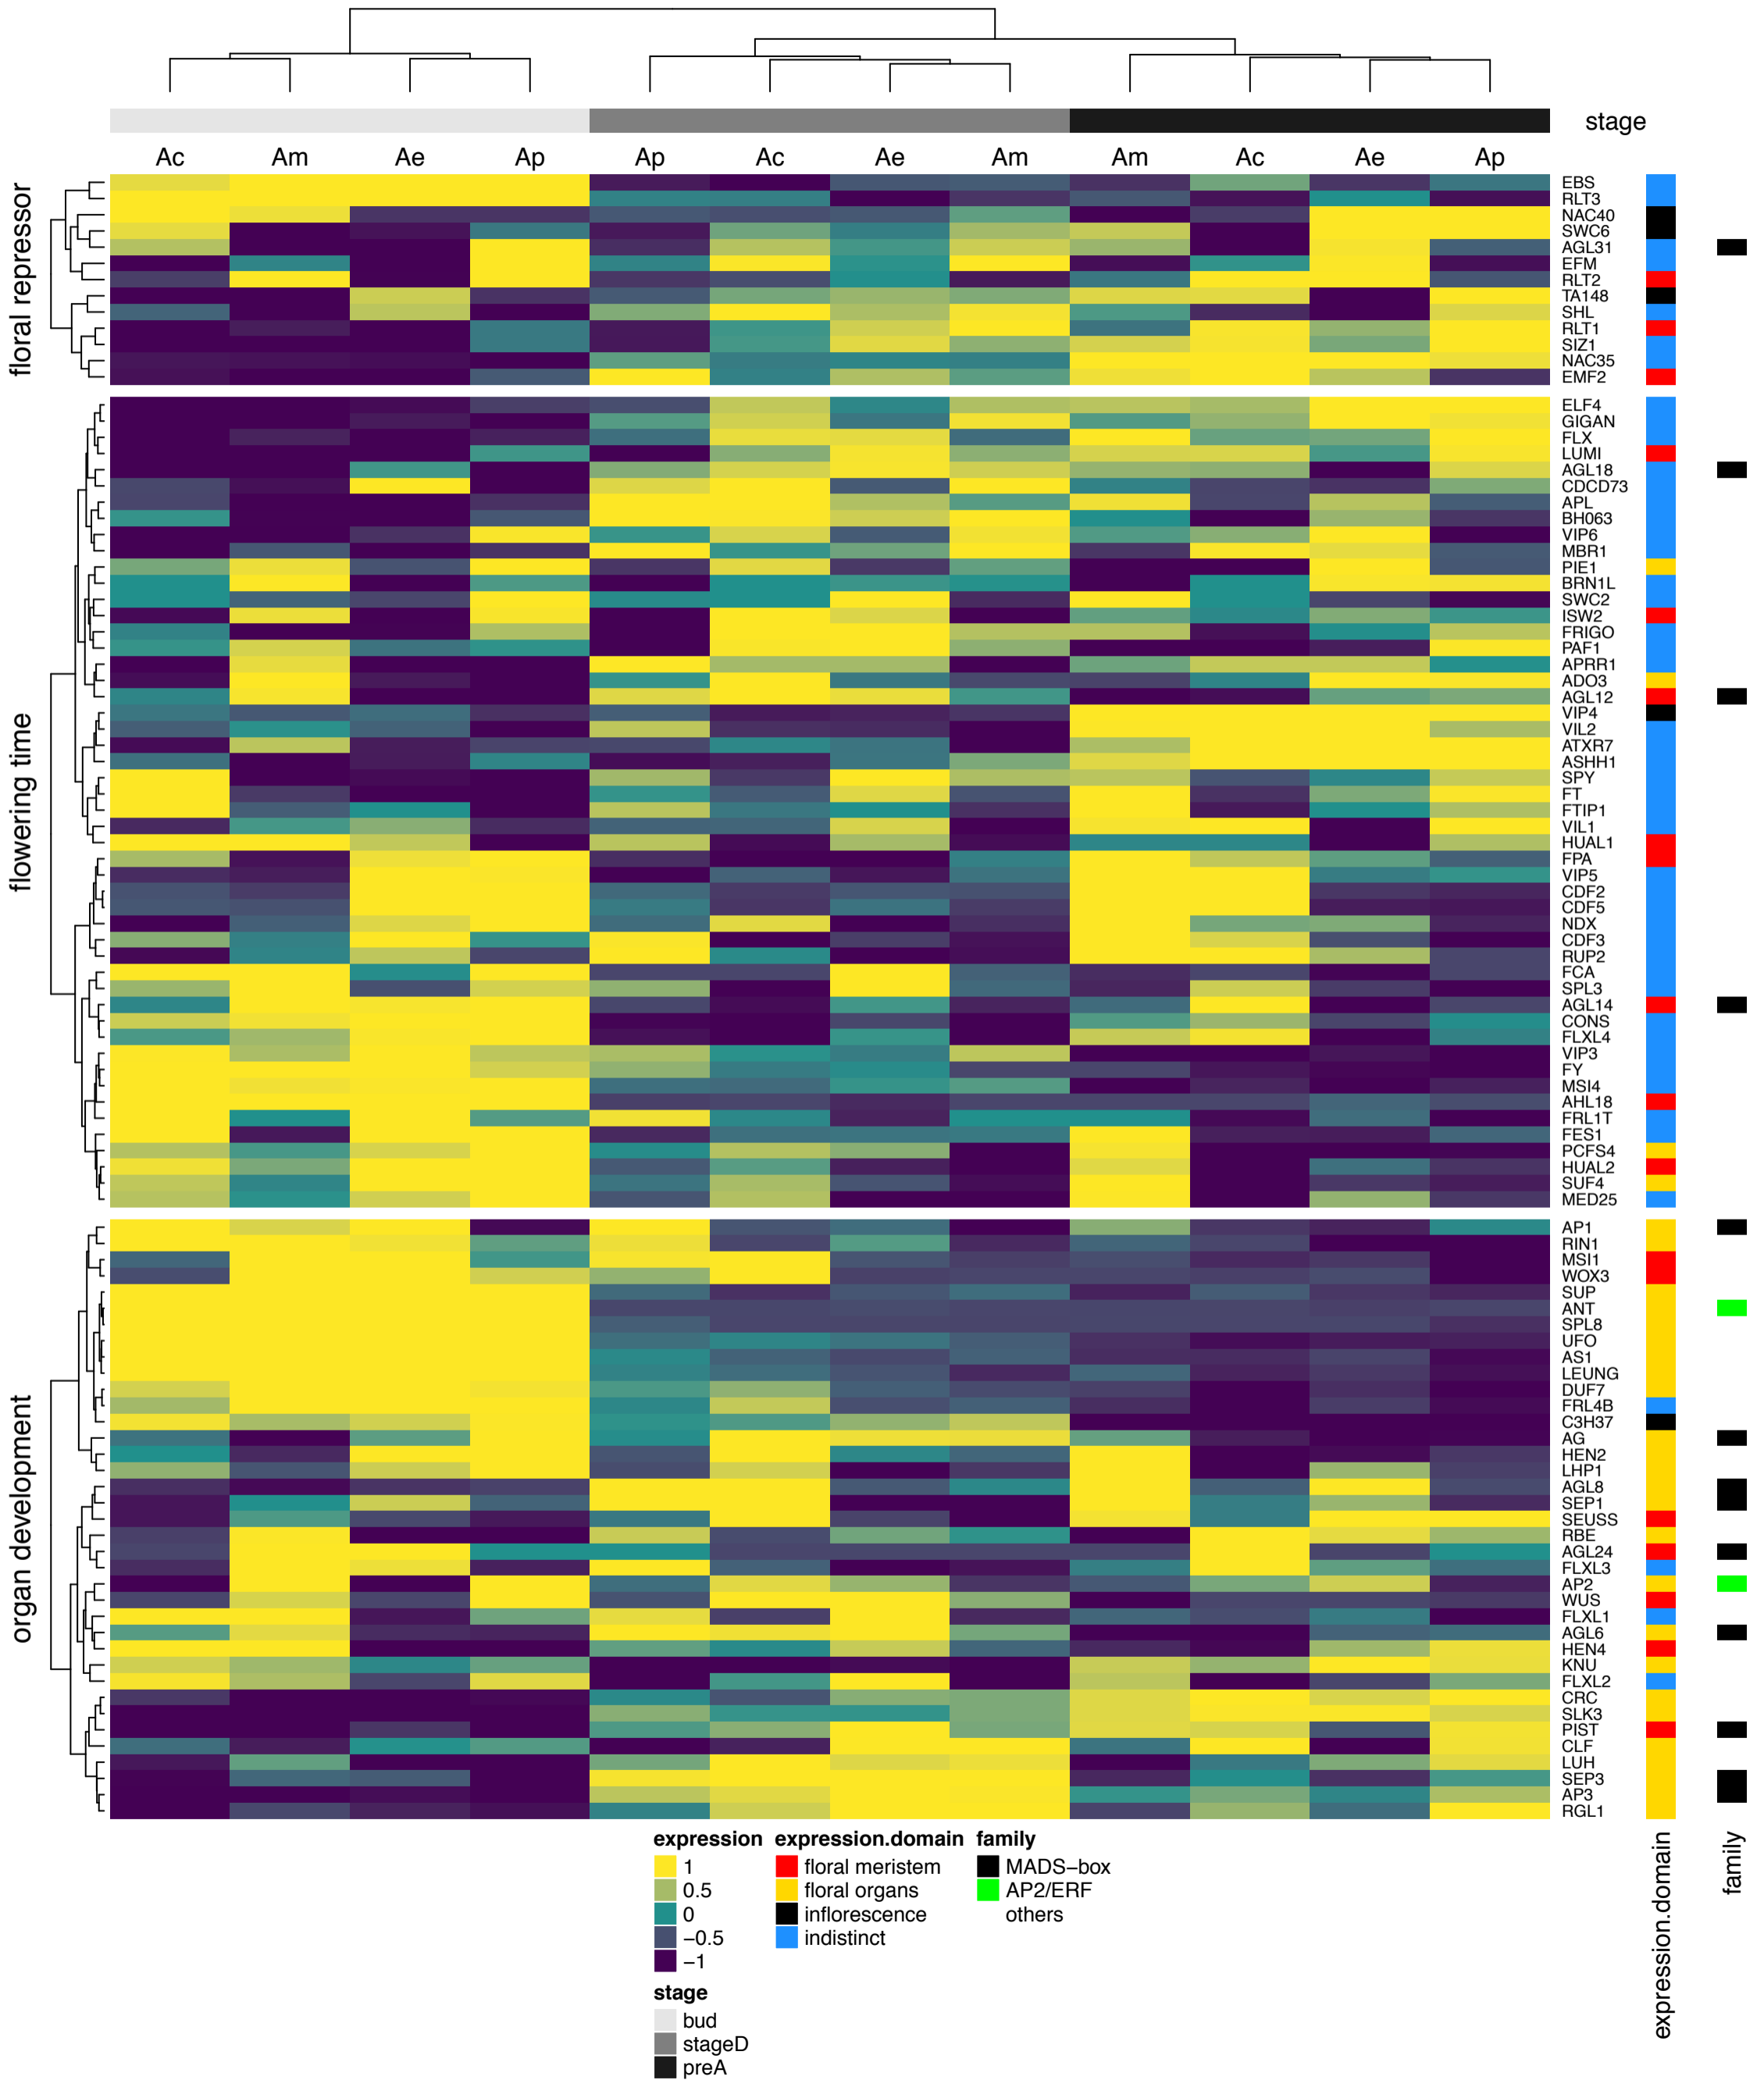

Supplement: 12864_2017_3623_MOESM10_ESM.pdf [file 12864_2017_3623_MOESM10_ESM.pdf]
