# Supplementary material for: Comparative transcriptome analyses of flower development in four species of Achimenes (Gesneriaceae)
Source: PubMed Central journal article supplement (PMC5359931; doi:10.1186/s12864-017-3623-8), 2017-03-20

Additional file 11: Figure S7. Neighbor-joining tree of R2R3-Mybs in *Achimenes*. Putative orthologs involved in regulating anthocyanin and carotenoid biosynthesis are highlighted in blue and orange, respectively. Bootstrap support >50 are indicated above branches.

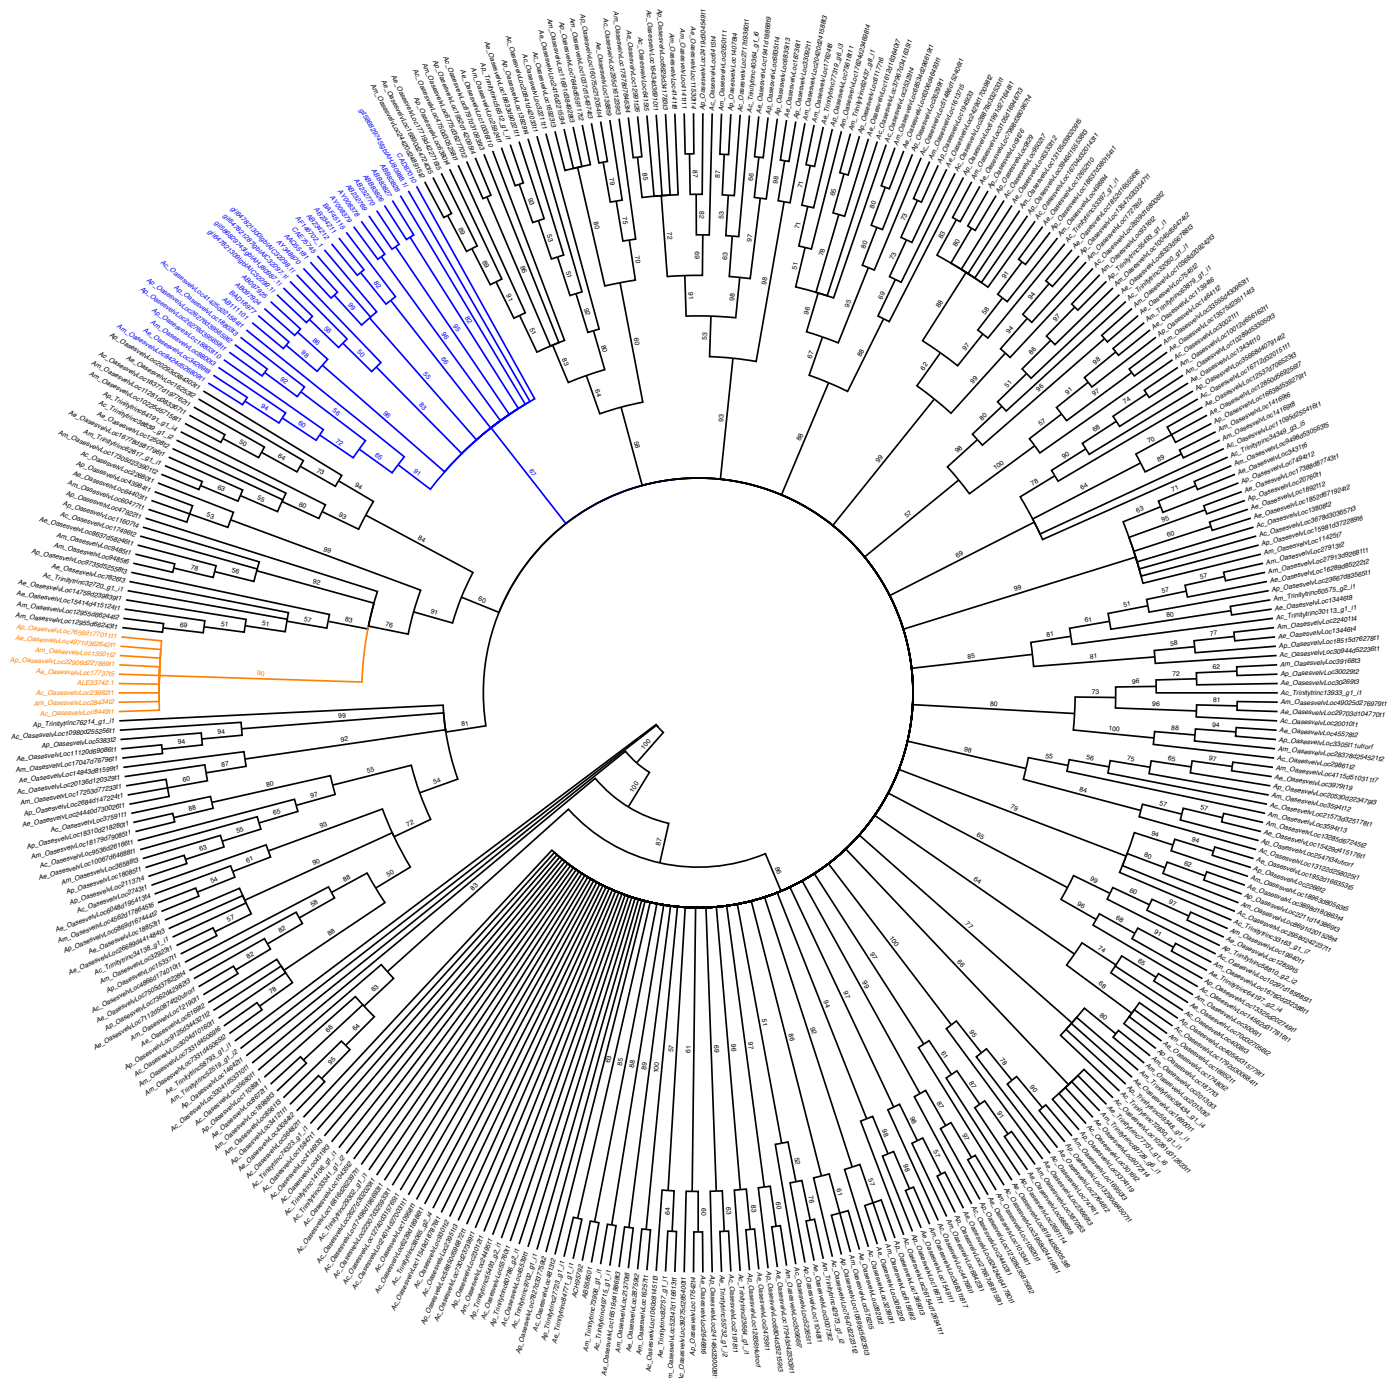

Supplement: 12864_2017_3623_MOESM11_ESM.pdf [file 12864_2017_3623_MOESM11_ESM.pdf]
