# Supplementary material for: Comparative transcriptome analyses of flower development in four species of Achimenes (Gesneriaceae)
Source: PubMed Central journal article supplement (PMC5359931; doi:10.1186/s12864-017-3623-8), 2017-03-20

Additional file 15: Figure S8. Coexpression clusters for *Achimenes* determined using Poisson mixture models. Gene profiles are depicted as boxplots. Conditions are as follows: 1, Bud stage; 2, Stage D; and 3, Pre-Anthesis stage. A, *A. cettoana*; B, *A. erecta*; C, *A. misera*; D, *A. patens*.

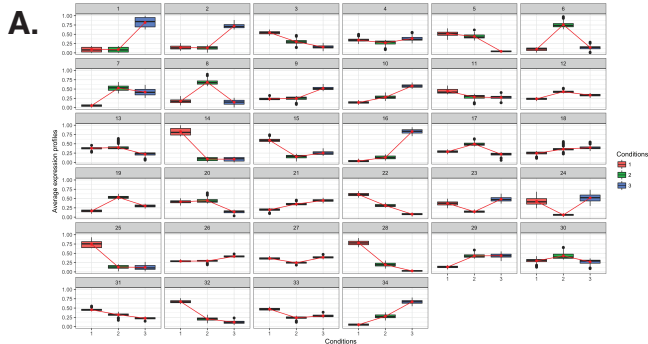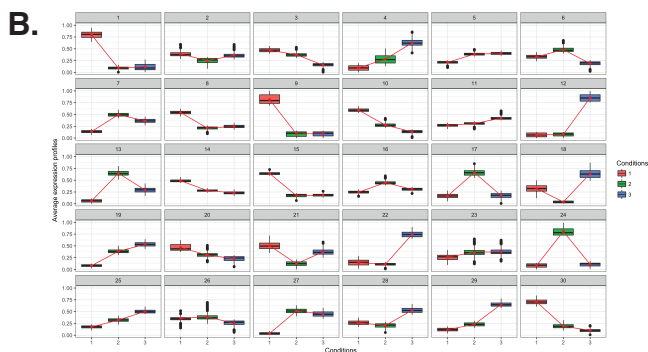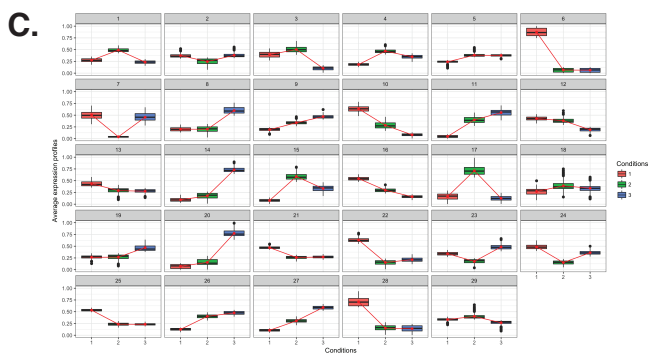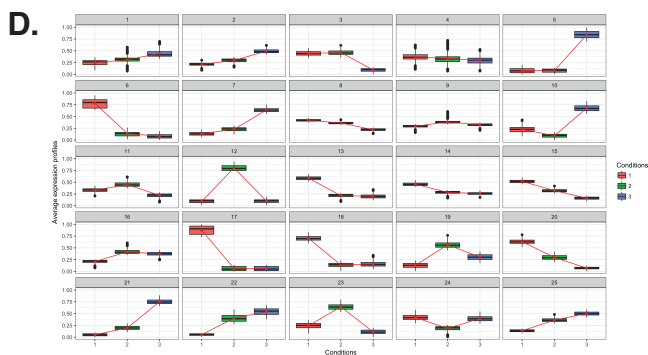

Supplement: 12864_2017_3623_MOESM15_ESM.pdf [file 12864_2017_3623_MOESM15_ESM.pdf]
