# Supplementary material for: Comparative transcriptome analyses of flower development in four species of Achimenes (Gesneriaceae)
Source: PubMed Central journal article supplement (PMC5359931; doi:10.1186/s12864-017-3623-8), 2017-03-20

Supplemental file 16: Figure S9. Maximum conditional probability of cluster membership assigned by coexpression clustering using Poisson mixture models. A, *Achimenes cettoana*; B, *A. erecta*; C, *A. misera*; D, *A. patens*.

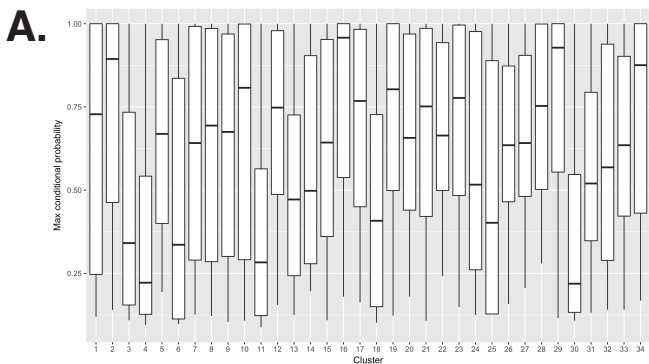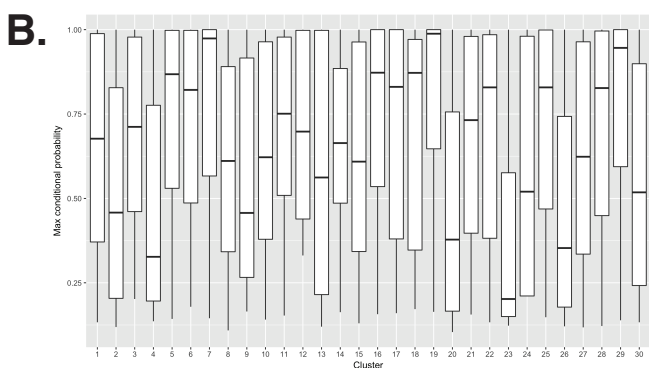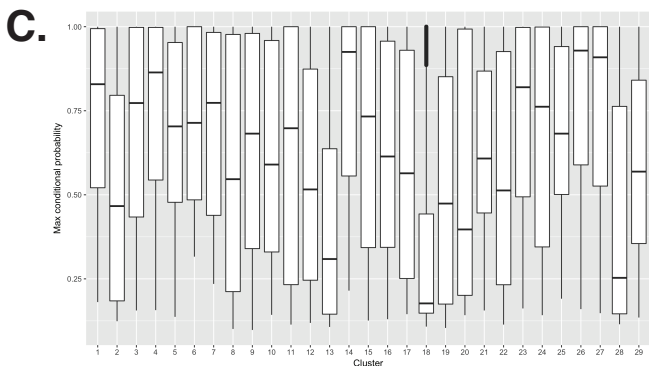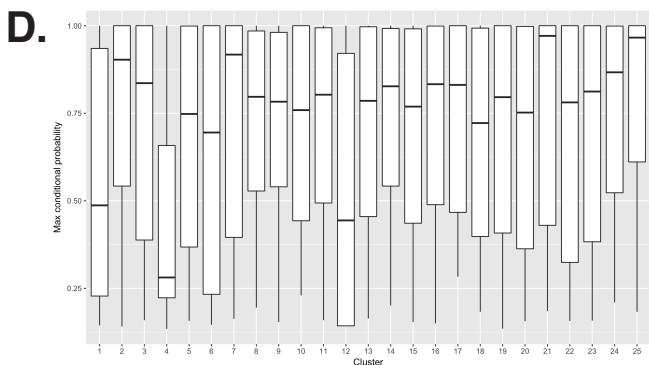

Supplement: 12864_2017_3623_MOESM16_ESM.pdf [file 12864_2017_3623_MOESM16_ESM.pdf]
